# Supplementary material
Source: PubMed Central journal article supplement (PMC7223993)
Supplement: 10877_2019_348_MOESM2_ESM.pdf [file 10877_2019_348_MOESM2_ESM.pdf]

**Event triggered averaging of electrical impedance tomography (EIT) respiratory waveforms as compared to low pass filtering for removal of cardiac related impedance changes**

Andrea Coppadoro, M.D. [1]; Nilde Eronia, M.D. [1]; Giuseppe Foti, M.D. [1] [2]; Giacomo Bellani, M.D., Ph.D.

[1] [2]

[1] Department of Anesthesia and Intensive Care, San Gerardo Hospital, Monza, Italy

[2] Department of Medicine and Surgery, University of Milan-Bicocca, Monza, Italy

**Corresponding author:** Giacomo Bellani: giacomo.bellani1@unimib.it; ORCID <http://orcid.org/0000-0002-3089-205X>

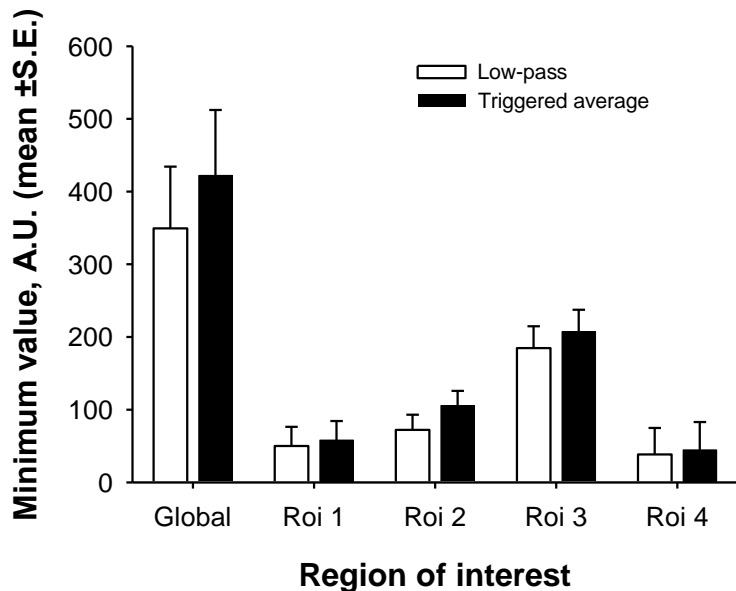

**Fig. S1** Minimum values (expressed in EIT arbitrary units) of the global EIT signal and the 4 ROIs event triggered averaging resulted higher than low-pass filtering (all  $p < 0.05$ )

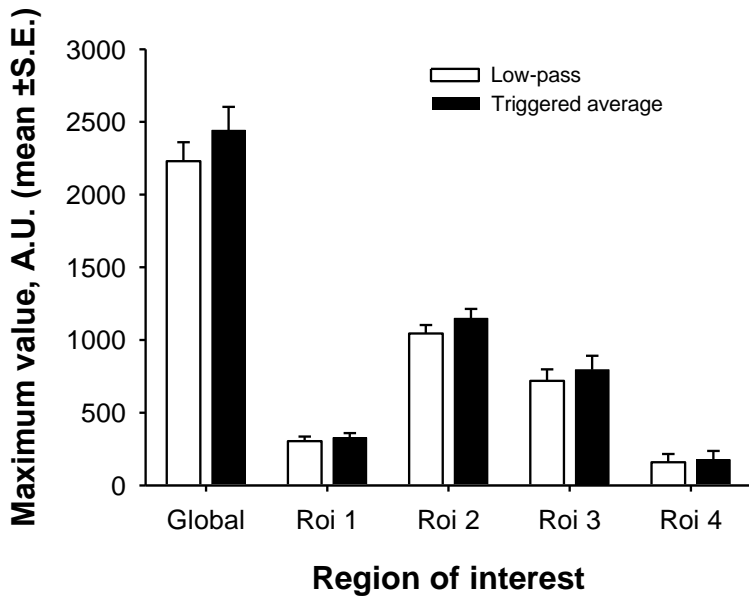

Fig. S2 Maximum values (expressed in EIT arbitrary units) of the global EIT signal and the 4 ROIs event triggered averaging resulted higher than low-pass filtering (all  $p < 0.05$ )

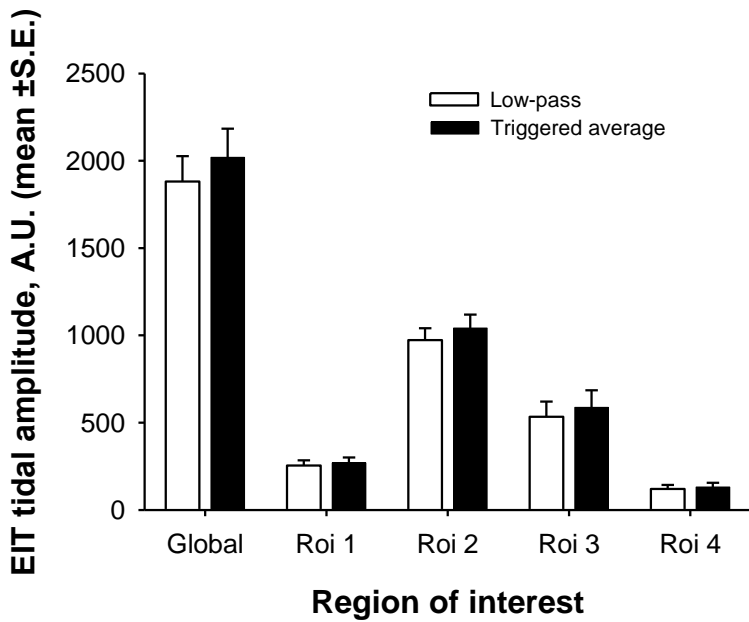

**Fig. S3** EIT tidal variations (expressed in arbitrary units, A.U.) of the global EIT signal and the 4 ROIs event triggered averaging were higher than low-pass filtering (all  $p < 0.05$ )
